# Supplementary material for: Natural cis-solamin is a mixture of two tetra-epimeric diastereoisomers: biosynthetic implications for Annonaceous acetogenins
Source: Royal Society of Chemistry journal article supplement (doi:10.1039/b601943a), 2006-01-01
Supplement: b601943a.pdf [file b601943a.pdf]

# Natural *cis*-Solamin is a Mixture of Tetra-Epimeric Diastereoisomers: Biosynthetic Implications for *Annonaceous* Acetogenins

Yulai Hu,<sup>a,†</sup> Alex R. L. Cecil,<sup>a</sup> Xavier Frank,<sup>b</sup> Christophe Gleye,<sup>b</sup> Bruno Figadère<sup>\*b</sup> and Richard C. D. Brown<sup>\*a</sup>

## Mosher Ester Data

**Table 1.** Diagnostic <sup>1</sup>H-NMR values (400 MHz, CDCl<sub>3</sub>) of (*S*)- and (*R*)-MTPA esters of solamin.

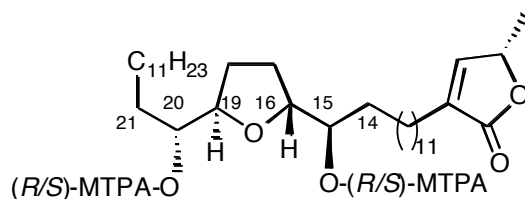

solamin Mosher's ester derivatives

| Atom    | <sup>1</sup> H δ values for <i>S</i> Mosher's ester (ppm) | <sup>1</sup> H δ values for <i>R</i> Mosher's ester (ppm) | Δδ ( <i>S</i> - <i>R</i> ) |
|---------|-----------------------------------------------------------|-----------------------------------------------------------|----------------------------|
| 1       | -                                                         | -                                                         |                            |
| 2       | -                                                         | -                                                         |                            |
| 3       | 2.26 t (7.4 Hz)                                           | 2.26 t (7.7 Hz)                                           |                            |
| 4       | 1.55 m                                                    | 1.53 m                                                    |                            |
| 5       | 1.17-1.36                                                 | 1.16-1.36                                                 |                            |
| 13      | 1.30 m                                                    | 1.16 m                                                    | + 0.14                     |
| 14      | 1.28 m                                                    | 1.51 m                                                    | + 0.07                     |
| 15      | 4.96 m                                                    | 5.03 m                                                    | -                          |
| 16      | 3.93 m                                                    | 4.00 m                                                    | - 0.07                     |
| 17,18   | 1.65 m                                                    | 1.92 m                                                    | - 0.27                     |
| 17,18   | 1.35 m                                                    | 1.56 m                                                    | - 0.21                     |
| 19      | 3.93 m                                                    | 4.00 m                                                    | - 0.07                     |
| 20      | 4.96 m                                                    | 5.03 m                                                    | -                          |
| 21      | 1.58 m                                                    | 1.51 m                                                    | + 0.07                     |
| 22      | 1.30 m                                                    | 1.16 m                                                    | + 0.14                     |
| 23-30   | 1.17-1.36                                                 | 1.16-1.36                                                 |                            |
| 31      | 1.30 m                                                    | 1.30 m                                                    |                            |
| 32      | 0.88 t (6.6 Hz)                                           | 0.88 t (6.6 Hz)                                           |                            |
| 33      | 6.98 d (1.4 Hz)                                           | 6.98 d (1.7 Hz)                                           |                            |
| 34      | 4.99 m                                                    | 4.99 m                                                    |                            |
| 35      | 1.41 d (6.8 Hz)                                           | 1.40 d (6.8 Hz)                                           |                            |
| MeO-10  | 3.52 s                                                    | 3.54 s                                                    |                            |
| Ar (5H) | 7.58 m and 7.38 m                                         | 7.58 m and 7.37 m                                         |                            |



**Chiral HPLC trace for a sample of *cis*-solamin A (1A):** (Chiral CD-Ph column with gaurd column, eluting with IPA/hexane 15/85 at a flow rate of 1 mL/min. UV detection at 210nm).

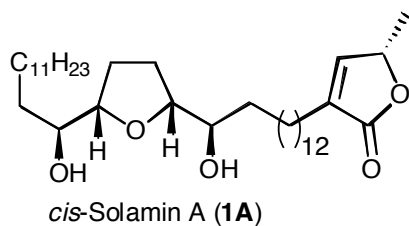

Sequence File : D:\HPCHEM\1\SEQUENCE\DEF\_LC.S  
 Method : C:\HPCHEM\1\METHODS\15IPAHEX.M  
 Last changed : 7/5/04 3:53:33 PM by pete  
 15% ipa 30 mins

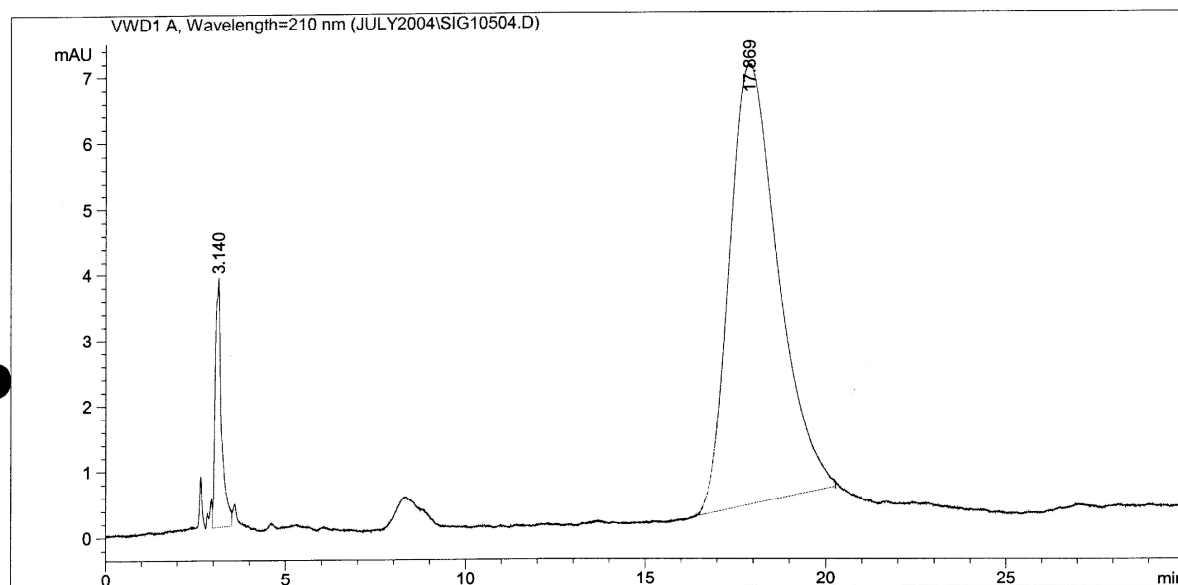

=====  
 Area Percent Report  
 =====

Sorted By : Signal  
 Multiplier : 1.0000  
 Dilution : 1.0000

Signal 1: VWD1 A, Wavelength=210 nm

| Peak # | RetTime [min] | Type | Width [min] | Area [mAU*s] | Height [mAU] | Area %  |
|--------|---------------|------|-------------|--------------|--------------|---------|
| 1      | 3.140         | VB   | 0.1550      | 45.67373     | 3.77930      | 6.8060  |
| 2      | 17.869        | BB   | 1.0922      | 625.40936    | 6.69299      | 93.1940 |

Totals : 671.08310 10.47229

Results obtained with enhanced integrator!

=====  
 \*\*\* End of Report \*\*\*

**Chiral HPLC trace for a sample of *cis*-solamin B (1B):** (Chiral CD-Ph column with gaurd column, eluting with IPA/hexane 15/85 at a flow rate of 1 mL/min. UV detection at 210nm).

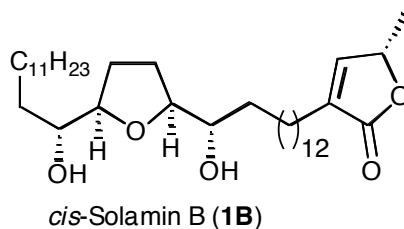

Sequence File : D:\HPCHEM\1\SEQUENCE\DEF\_LC.S  
 Method : C:\HPCHEM\1\METHODS\15IPAHEX.M  
 Last changed : 7/5/04 6:13:00 PM by pete  
 15% ipa 30 mins

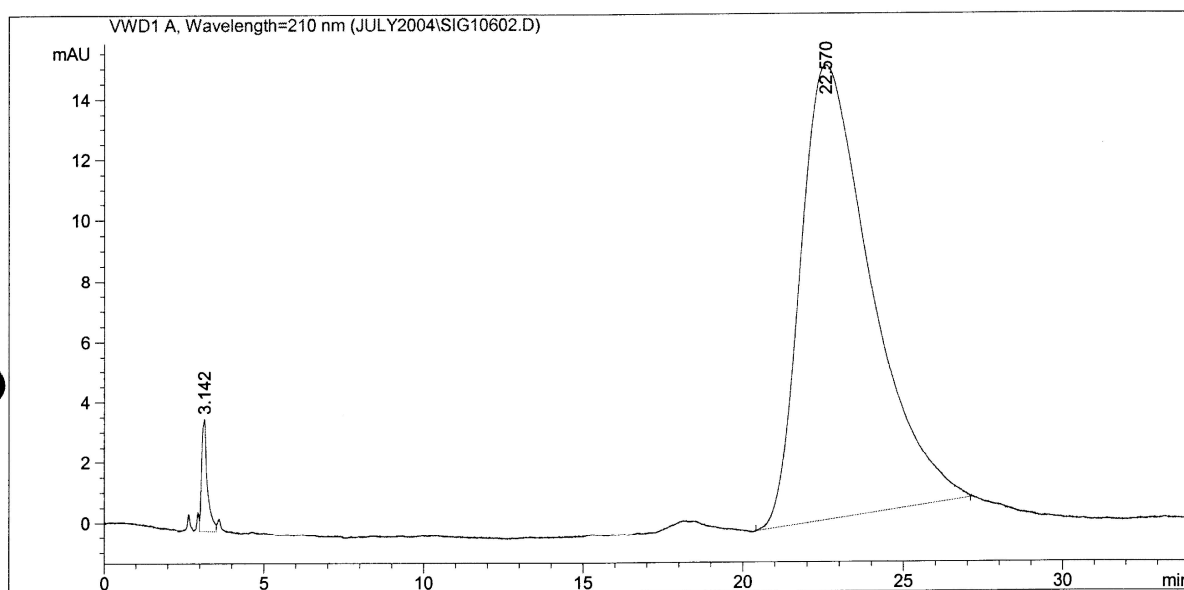

=====  
 Area Percent Report  
 =====

Sorted By : Signal  
 Multiplier : 1.0000  
 Dilution : 1.0000

Signal 1: VWD1 A, Wavelength=210 nm

| Peak # | RetTime [min] | Type | Width [min] | Area [mAU*s] | Height [mAU] | Area %  |
|--------|---------------|------|-------------|--------------|--------------|---------|
| 1      | 3.142         | VB   | 0.1583      | 45.86706     | 3.70944      | 1.9785  |
| 2      | 22.570        | PB   | 1.7674      | 2272.36548   | 15.01701     | 98.0215 |

Totals : 2318.23254 18.72646

Results obtained with enhanced integrator!

=====  
 \*\*\* End of Report \*\*\*
